# Supplementary material
Source: MDPI journal article supplement (https://www.mdpi.com/2673-6772/3/2/17)
Supplement: s1 [file s1]

Table S1: A Questionnaire for patients with eosinophilia at first encounter and after therapy

| Section A:                                                                        |     |    |
|-----------------------------------------------------------------------------------|-----|----|
| Please fill in your personal details                                              |     |    |
| Name                                                                              |     |    |
| Age                                                                               |     |    |
| Gender                                                                            |     |    |
| Telephone number                                                                  |     |    |
| Patient ID                                                                        |     |    |
| Place of residence                                                                |     |    |
| Village/town/city                                                                 |     |    |
| Occupation                                                                        |     |    |
| Section B:                                                                        |     |    |
| Please answer the following questions by marking the appropriate answer with an X |     |    |
|                                                                                   | YES | NO |
| Do you wash hands before eating?                                                  |     |    |
| Do you wash hands after going to the toilet?                                      |     |    |
| Do you use soap for washing hands?                                                |     |    |
| Do you walk barefoot when outdoor?                                                |     |    |
| Do you have Latrine at home?                                                      |     |    |
| Do use the Latrine everytime?                                                     |     |    |
| Do you clean the vegetables before eating?                                        |     |    |
| Do you eat raw food (meat, vegetables)?                                           |     |    |
| Do you know how you can get infections with worms?                                |     |    |
| Did you ever see a worm in your stool?                                            |     |    |
| Were you ever treated with a medication against worms?                            |     |    |

|                                                                                                                                                                                                                                                                   |                 |               |
|-------------------------------------------------------------------------------------------------------------------------------------------------------------------------------------------------------------------------------------------------------------------|-----------------|---------------|
| If yes, please mention where you got it (doctor/pharmacy/health care service programs/other)?                                                                                                                                                                     |                 |               |
| Do you have allergic disorders like Asthma, Atopic dermatitis, Allergic Rhinitis; can you please mention what is the disorder?                                                                                                                                    |                 |               |
| Did you receive a new medication during the past 10 days?                                                                                                                                                                                                         |                 |               |
| Do you have a chronic infection with Worms?                                                                                                                                                                                                                       |                 |               |
| If yes, how do you know it?                                                                                                                                                                                                                                       |                 |               |
| <p>Section C: In this section you'll need to answer the following questions by marking with an X regarding your health status alterations within <u>the past month</u>.</p> <p>After therapy administration you will have to answer the same questions again.</p> |                 |               |
|                                                                                                                                                                                                                                                                   | First encounter | After therapy |
| Did you notice skin changes like rash, swelling, redness or itching?                                                                                                                                                                                              |                 |               |
| Did you have shortness of breath, coughs (dry or wet) or wheezing?                                                                                                                                                                                                |                 |               |
| Did you spit blood while you were coughing?                                                                                                                                                                                                                       |                 |               |
| Did you have chest pain?                                                                                                                                                                                                                                          |                 |               |
| Did you have diarrhea? How many times a day?                                                                                                                                                                                                                      |                 |               |
| Is it watery or bloody?                                                                                                                                                                                                                                           |                 |               |
| Did you lose weight recently?                                                                                                                                                                                                                                     |                 |               |
| Did you have abdominal pain?                                                                                                                                                                                                                                      |                 |               |
| Did you have Nausea or vomiting?                                                                                                                                                                                                                                  |                 |               |
| Do you have blood in stool?                                                                                                                                                                                                                                       |                 |               |
| Did you have constipation?                                                                                                                                                                                                                                        |                 |               |
| Did you have fever?                                                                                                                                                                                                                                               |                 |               |
| Did you have chills/feeling cold ?                                                                                                                                                                                                                                |                 |               |
| Did you have muscle pain?                                                                                                                                                                                                                                         |                 |               |

|                                                              |  |  |
|--------------------------------------------------------------|--|--|
| Did you have headache?                                       |  |  |
| Did you have throat irritation?                              |  |  |
| Do you have chronic upper/lower limb swelling?               |  |  |
| Did you have visual loss or redness/irritation in your eyes? |  |  |
